# Supplementary material for: Local electromechanical alterations determine the left ventricle rotational dynamics in CRT-eligible heart failure patients
Source: PubMed Central journal article supplement (PMC7865069; doi:10.1038/s41598-021-82793-1), 2021-02-05
Supplement: 41598_2021_82793_MOESM1_ESM.pdf [file 41598_2021_82793_MOESM1_ESM.pdf]

**Title: Local electromechanical alterations determine the left ventricle rotational dynamics  
in CRT-eligible heart failure patients**

**Supplementary materials**

**Authors:** Tomasz Jadczyk<sup>1,2#</sup>, Radoslaw Kurzelowski<sup>1#</sup>, Krzysztof S. Golba<sup>3</sup>, Jacek Wilczek<sup>3</sup>, Guido Caluori<sup>2,4</sup>, Francesco Maffessanti<sup>5</sup>, Jolanta Biernat<sup>3</sup>, Katarzyna Gruszczynska<sup>6</sup>, Magdalena Cybulska<sup>3</sup>, Maximilian Y. Emmert<sup>7,8</sup>, Zofia Parma<sup>1</sup>, Kamil Baranski<sup>9</sup>, Mieczyslaw Dutka<sup>10</sup>, Barbara Kalanska<sup>1</sup>, Zdenek Starek<sup>2,11</sup> and Wojciech Wojakowski<sup>1\*</sup>

#equal contribution

**Affiliations:**

<sup>1</sup>Department of Cardiology and Structural Heart Disease, Medical University of Silesia, Katowice, Poland

<sup>2</sup>Interventional Cardiac Electrophysiology Group, International Clinical Research Center, St. Anne's University Hospital Brno, Czech Republic

<sup>3</sup>Department of Electrocardiology and Heart Failure, Medical University of Silesia, Katowice, Poland

<sup>4</sup>IHU-LIRYC, Inserm U1045 (CRBCT), Bordeaux, France

<sup>5</sup>Center for Computational Medicine in Cardiology, Università della Svizzera Italiana, Lugano, Switzerland

<sup>6</sup>Department of Diagnostic Imaging, Medical University of Silesia, Katowice, Poland.

<sup>7</sup>Department of Cardiovascular Surgery, Charité Universitätsmedizin Berlin, Berlin, Germany

<sup>8</sup>Department of Cardiothoracic and Vascular Surgery, German Heart Center Berlin, Berlin,  
Germany

<sup>9</sup>Department of Epidemiology, Medical University of Silesia, Katowice, Poland

<sup>10</sup>Department of Biochemistry and Molecular Biology, Faculty of Health Sciences, University of  
Bielsko-Biala, Bielsko-Biała, Poland

<sup>11</sup>1st Department of Internal Medicine - Cardioangiology, St. Anne's University Hospital Brno,  
Czech Republic

**Address for correspondence**

Wojciech Wojakowski MD, PhD

Department of Cardiology and Structural Heart Diseases

Medical University of Silesia

Ziołowa 45-47, Katowice, Poland

Tel: +48-32 2523930, Fax: +48-32 2523930

e-mail: [wwojakowski@sum.edu.pl](mailto:wwojakowski@sum.edu.pl)

# 1. Supplementary Figures

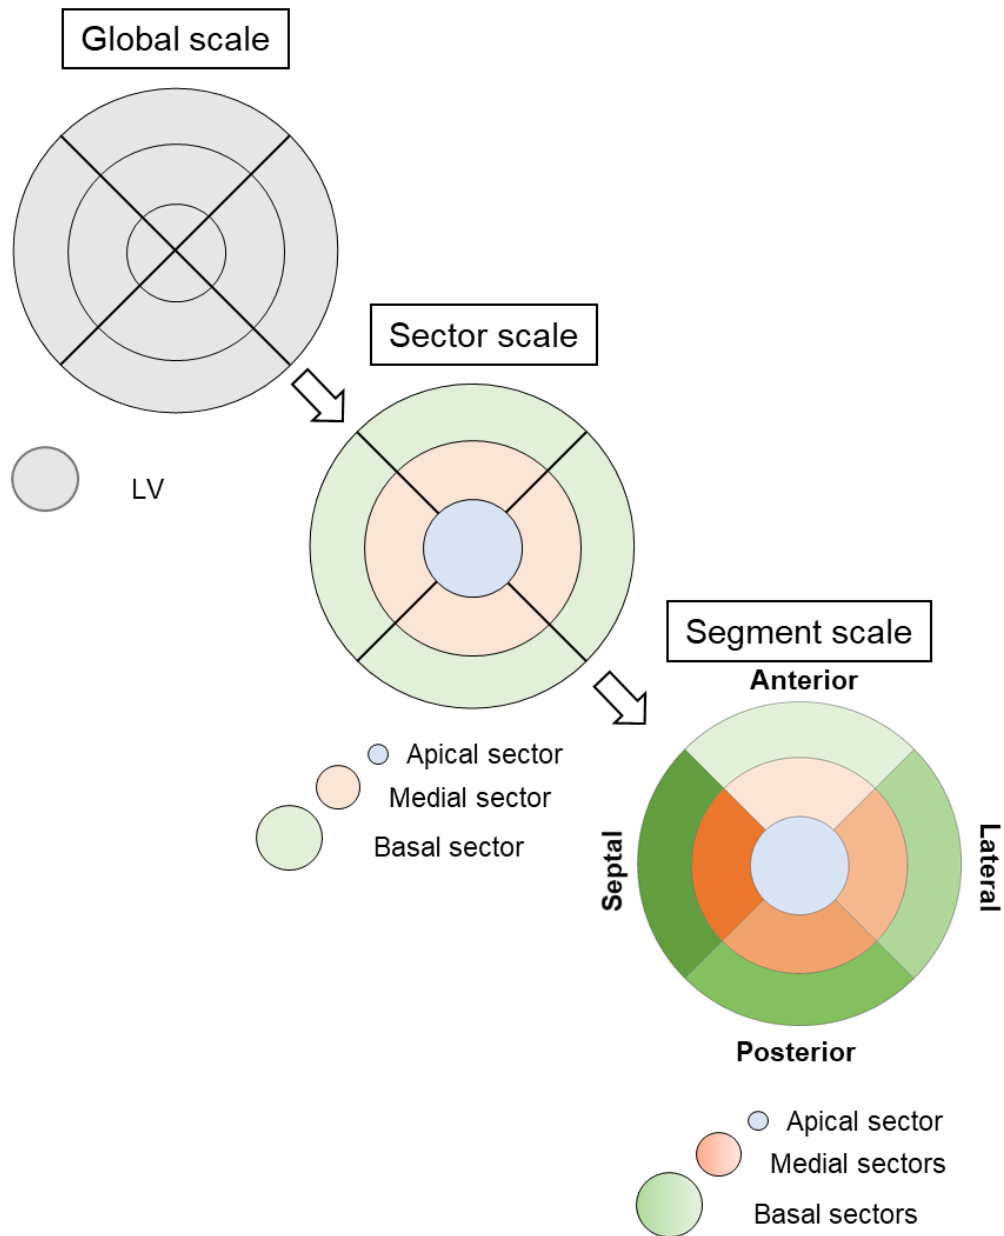

**Supplementary Figure S1.** Schematic representation of the multiscale approach for the parameter analysis used in this study

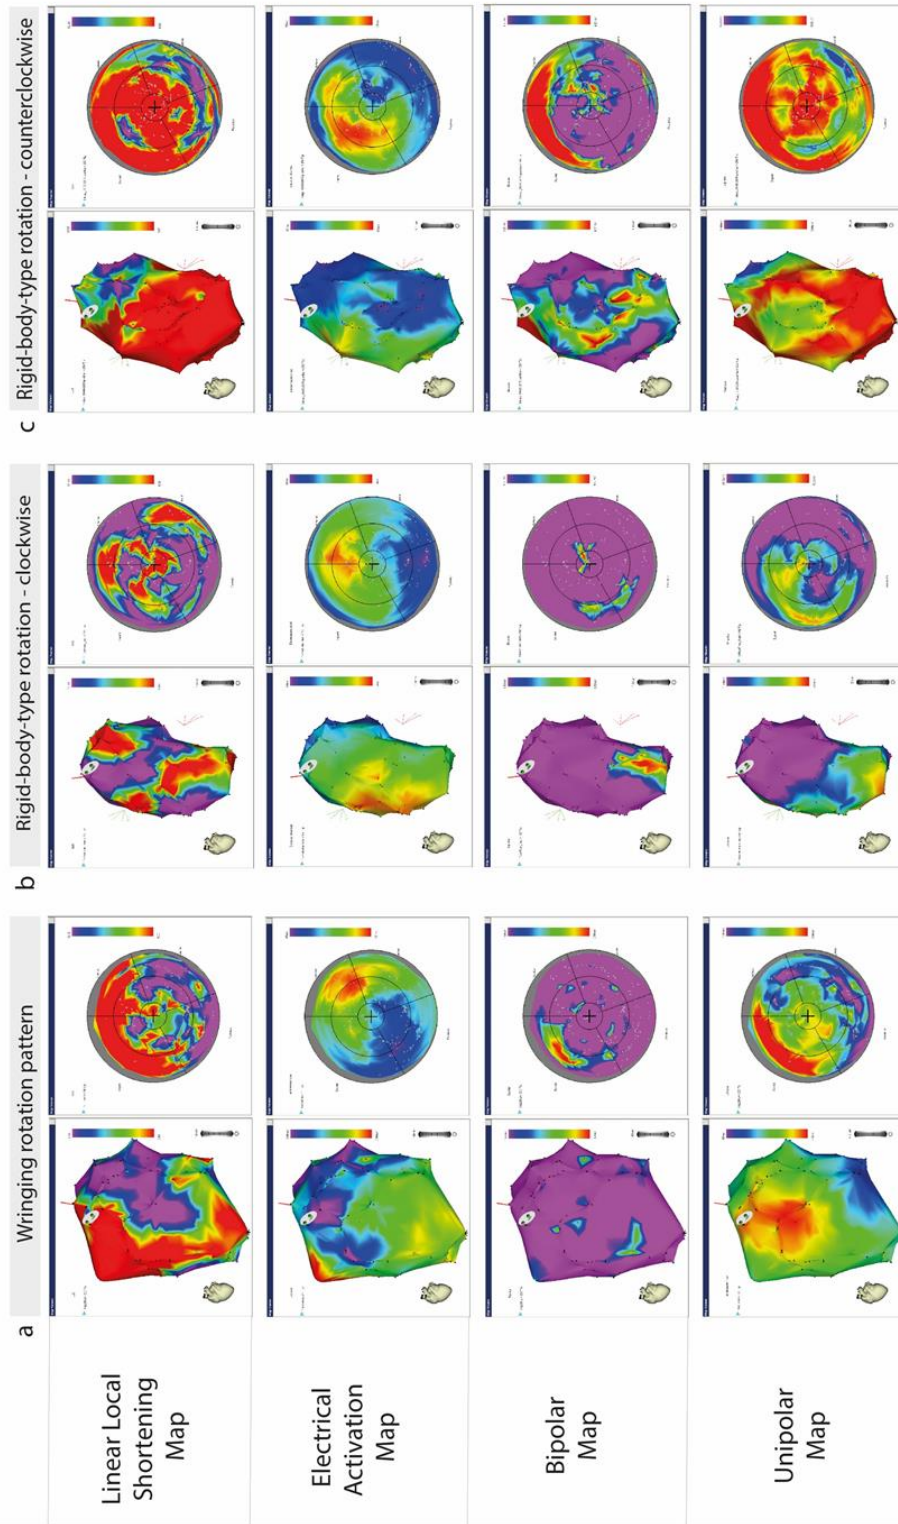

**Supplementary Figure S2.** Representative 3D and bullseye maps of cardiac parameters of the LV endocardium detected with the employed electromechanical system.

**Wringing rotation  
(Group A)**

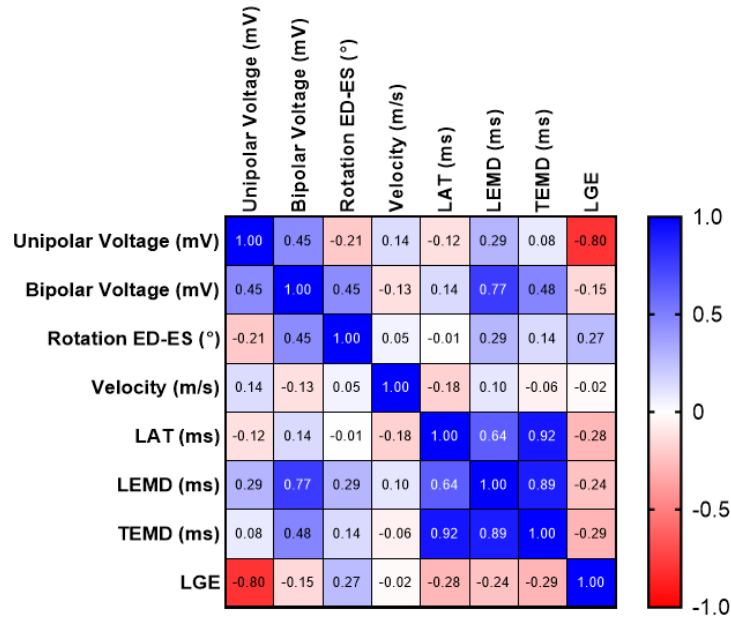

**Rigid body-type rotation  
(Group B)**

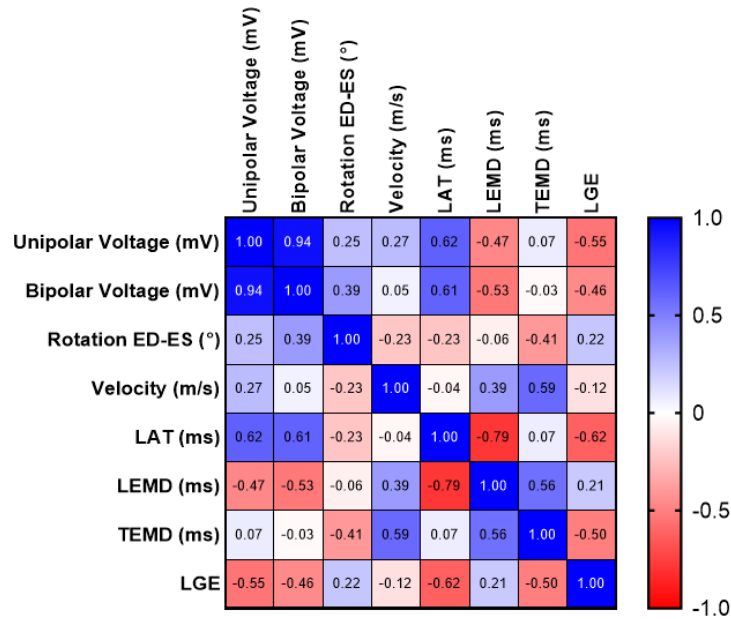

**Supplementary Figure S3.** Correlation matrix of the Pearson's' coefficients for wringing rotation (Group A, top) and rigid-body-type rotation (Group B, bottom)

## 2. Supplementary tables

**Supplementary Table S1** Basic definitions and parameters used to assess LV electro-mechanics

| <b>Parameter (unit)</b> | <b>Definition</b>                                                                                                                                                                                                                                                                                                                                                                                                                                                                                                                                                                                  | <b>Level of analysis</b><br><br>(Global=G,<br><br>Sectorial = SEC,<br><br>Segmental=SEG) |
|-------------------------|----------------------------------------------------------------------------------------------------------------------------------------------------------------------------------------------------------------------------------------------------------------------------------------------------------------------------------------------------------------------------------------------------------------------------------------------------------------------------------------------------------------------------------------------------------------------------------------------------|------------------------------------------------------------------------------------------|
| LV peak torsion (°)     | <p>Maximum apex–base (maximum value among 4 basal segments) circumferential-longitudinal shear angle of the LV; according to the formula by Russel et al.<sup>1</sup></p> $T = \frac{(\phi_{\text{apex}} \rho_{\text{apex}} - \phi_{\text{base}} \rho_{\text{base}})}{D}$ <p>T – torsion</p> <p><math>\phi_{\text{apex}}</math> – rotation of the apex</p> <p><math>\phi_{\text{base}}</math> – rotation of the base</p> <p><math>\rho_{\text{apex}}</math> - radius of the apex</p> <p><math>\rho_{\text{base}}</math> - radius of the base</p> <p>D – distance between the apex and the base</p> | G                                                                                        |
| LV mean torsion (°)     | <p>Mean apex-base (mean value of 4 basal segments) circumferential-longitudinal shear angle of the LV; according to the formula by Russel et al. <sup>1</sup>.</p>                                                                                                                                                                                                                                                                                                                                                                                                                                 | G                                                                                        |
| Rotation angle (°)      | Mean systolic rotation of the each segment or                                                                                                                                                                                                                                                                                                                                                                                                                                                                                                                                                      | SEC, SEG                                                                                 |

|                                    |                                                                                                                                                                                                   |             |
|------------------------------------|---------------------------------------------------------------------------------------------------------------------------------------------------------------------------------------------------|-------------|
|                                    | sector short-axis cross section as viewed from the apex                                                                                                                                           |             |
| Rotation rate (°/s)                | Mean value of systolic angular displacement rate                                                                                                                                                  | G, SEC, SEG |
| Interventricular delay (ms)        | Delay between electrical activation of the right and left ventricle - measured as time delay from ECG lead V1 to earliest LV endocardial electrical activation registered at the mapping catheter | G           |
| LV electrical activation time (ms) | Time between the earliest and the latest LV electrical activation                                                                                                                                 | G           |
| LV electrical cycle length (ms)    | ECG interval between two successive R wave peaks                                                                                                                                                  | G           |
| LV mechanical cycle length (ms)    | Interval between two peak systolic mechanical activations                                                                                                                                         | G           |
| Unipolar voltage (mV)              | Endocardial voltage measured as unipolar amplitude at the tip-electrode of the catheter                                                                                                           | G, SEC, SEG |
| Bipolar voltage (mV)               | Endocardial voltage measured as bipolar amplitude between tip- and ring-electrode of the catheter                                                                                                 | G, SEC, SEG |
| Local activation time, LAT (ms)    | Time interval between earliest electrical activation in LV and local electrical activation in the respective segment                                                                              | SEC, SEG    |
| Local rotational electro-          | Time interval between the local electrical                                                                                                                                                        | SEC, SEG    |

|                                                             |                                                                                                                |             |
|-------------------------------------------------------------|----------------------------------------------------------------------------------------------------------------|-------------|
| mechanical delay,<br>LEMD (ms)                              | activation of the segment and its local systolic<br>peak rotation                                              |             |
| LV rotational electro-<br>mechanical delay (ms)             | Average 9 segments LEMD                                                                                        | G           |
| Total rotational electro-<br>mechanical delay,<br>TEMD (ms) | Time interval between earliest electrical<br>activation of the LV and systolic rotation<br>peak of the segment | G, SEC, SEG |
| Late gadolinium<br>enhancement, LGE,<br>intensity (%)       | Percentage of the segment area with<br>intensified brighter signal                                             | G, SEC, SEG |

LAT, Local activation time. LGE, Late gadolinium enhancement. LEMD, Local rotational electro-mechanical delay. LV, Left ventricle TEMD, Total rotational electro-mechanical delay.



**Supplementary Table S2** Sectorial EM comparison between LV with preserved rotation and rigid body-type rotation

| Parameter               | Sector | Group A     | Group B      | P value |
|-------------------------|--------|-------------|--------------|---------|
| Unipolar voltage (mV)   | Apical | 7.31 ± 2.13 | 8.33 ± 2.87  | 0.683   |
|                         | Medial | 8.14 ± 0.73 | 10.06 ± 2.21 | 0.175   |
|                         | Basal  | 7.72 ± 2.12 | 10.03 ± 1.70 | 0.075   |
| Bipolar voltage (mV)    | Apical | 2.28 ± 1.18 | 2.0 ± 0.76   | 0.898   |
|                         | Medial | 2.29 ± 0.84 | 2.89 ± 1.16  | 0.455   |
|                         | Basal  | 1.91 ± 0.68 | 3.02 ± 1.01  | 0.044   |
| Rotation angle (°)      | Apical | 7.0 ± 3.8   | -5.5 ± 6.0   | <0.0001 |
|                         | Medial | 1.0 ± 2.6   | -4.5 ± 1.4   | 0.003   |
|                         | Basal  | -2.2 ± 2.2  | -6.4 ± 1.6   | 0.035   |
| Rotation velocity (m/s) | Apical | 48.3 ± 30.6 | 40.2 ± 15.3  | 0.343   |
|                         | Medial | 23.25 ± 0.6 | 41.13 ± 2.7  | 0.003   |
|                         | Basal  | 31.50 ± 8.3 | 38.7 ± 5.5   | 0.443   |
| LAT (ms)                | Apical | 26 ± 15     | 14 ± 14      | 0.183   |
|                         | Medial | 34 ± 21     | 26 ± 13      | 0.498   |
|                         | Basal  | 53 ± 13     | 46 ± 10      | 0.597   |
| LEMD (ms)               | Apical | 373 ± 72    | 383 ± 56     | 0.897   |
|                         | Medial | 362 ± 20    | 379 ± 12     | 0.682   |
|                         | Basal  | 375 ± 13    | 349 ± 14     | 0.302   |
| TEMD (ms)               | Apical | 398 ± 70    | 397 ± 53     | 0.999   |
|                         | Medial | 396 ± 39    | 100 ± 16     | 0.989   |

|                   |        |             |            |        |
|-------------------|--------|-------------|------------|--------|
|                   | Basal  | 429 ± 22    | 395 ± 14   | 0.128  |
| LGE Intensity (%) | Apical | 13.33±10.27 | 11.19±3.29 | 0.7006 |
|                   | Medial | 3.9±2.91    | 6.96±4.68  | 0.4200 |
|                   | Basal  | 3.91±4.05   | 5.83±3.04  | 0.7649 |

LAT, Local activation time. LGE, Late gadolinium enhancement. LEMD, Local rotational electro-mechanical delay. TEMD, Total rotational electro-mechanical delay. Values are mean ± SD

**Supplementary Table S3** Sectorial EM comparison within groups with wringing rotation (Group A) and rigid-body-type rotation (Group B)

| Parameter               | Comparison       | P value (Group A) | P value (Group B) |
|-------------------------|------------------|-------------------|-------------------|
| Unipolar voltage (mV)   | Apical vs Medial | 0.889             | 0.025             |
|                         | Apical vs Basal  | 0.985             | 0.029             |
|                         | Basal vs Medial  | 0.983             | >1.000            |
| Bipolar voltage (mV)    | Apical vs Medial | >0.9999           | 0.007             |
|                         | Apical vs Basal  | 0.885             | 0.002             |
|                         | Basal vs Medial  | 0.877             | 0.956             |
| Rotation angle (°)      | Apical vs Medial | 0.016             | 0.731             |
|                         | Apical vs Basal  | <0.0001           | 0.756             |
|                         | Basal vs Medial  | 0.310             | 0.200             |
| Rotation velocity (m/s) | Apical vs Medial | 0.001             | 0.990             |
|                         | Apical vs Basal  | 0.042             | 0.959             |
|                         | Basal vs Medial  | 0.527             | 0.851             |
| LAT (ms)                | Apical vs Medial | 0.685             | 0.013             |
|                         | Apical vs Basal  | 0.002             | <0.0001           |
|                         | Basal vs Medial  | 0.037             | <0.0001           |
| LEMD (ms)               | Apical vs Medial | 0.943             | 0.967             |
|                         | Apical vs Basal  | 0.999             | 0.004             |
|                         | Basal vs Medial  | 0.900             | 0.015             |
| TEMD (ms)               | Apical vs Medial | 0.999             | 0.987             |
|                         | Apical vs Basal  | 0.385             | 0.996             |

|                   |                  |        |        |
|-------------------|------------------|--------|--------|
|                   | Basal vs Medial  | 0.311  | 0.944  |
| LGE Intensity (%) | Apical vs Medial | 0.003  | 0.009  |
|                   | Apical vs Basal  | 0.003  | 0.0007 |
|                   | Basal vs Medial  | >0.999 | 0.801  |

LAT, Local activation time. LGE, Late gadolinium enhancement. LEMD, Local rotational electro-mechanical delay. TEMD, Total rotational electro-mechanical delay. Values are mean  $\pm$  SD

**Supplementary Table S4** Segmental EM comparison between groups with wringing rotation (Group A) and rigid-body-type rotation (Group B)

| Parameter             | Segment      | Group A      | Group B      | P value |
|-----------------------|--------------|--------------|--------------|---------|
| Unipolar voltage (mV) | Apex         | 7.31 ± 2.13  | 8.54 ± 2.87  | 0.999   |
|                       | Midanterior  | 9.13 ± 1.61  | 7.93 ± 3.79  | >1.000  |
|                       | Anterobasal  | 10.43 ± 2.28 | 8.78 ± 3.02  | 1.000   |
|                       | Midlateral   | 7.89 ± 1.80  | 9.97 ± 3.87  | 0.554   |
|                       | Basolateral  | 8.65 ± 3.00  | 12.07 ± 4.74 | 0.247   |
|                       | Midposterior | 8.39 ± 3.92  | 12.45 ± 4.68 | 0.023   |
|                       | Posterobasal | 7.16 ± 3.36  | 10.00 ± 4.04 | 0.216   |
|                       | Midseptal    | 7.14 ± 1.93  | 6.76 ± 3.04  | >1.000  |
|                       | Basoseptal   | 4.65 ± 2.09  | 7.72 ± 3.01  | 0.520   |
| Bipolar voltage (mV)  | Apex         | 2.28 ± 1.18  | 2 ± 0.76     | >1.000  |
|                       | Midanterior  | 1.61 ± 0.9   | 1.85 ± 1.3   | >1.000  |
|                       | Anterobasal  | 2.37 ± 2.45  | 2.51 ± 1.64  | >1.000  |
|                       | Midlateral   | 1.84 ± 0.63  | 3.06 ± 2.11  | 0.780   |
|                       | Basolateral  | 1.91 ± 1.17  | 4.06 ± 2.35  | 0.107   |
|                       | Midposterior | 3.73 ± 3.49  | 4.71 ± 2.33  | 0.927   |
|                       | Posterobasal | 2.56 ± 2.08  | 3.9 ± 2.82   | 0.678   |
|                       | Midseptal    | 1.97 ± 1.51  | 1.92 ± 1.48  | >1.000  |
|                       | Basoseptal   | 0.8 ± 0.69   | 1.62 ± 1.25  | 0.976   |
| Rotation angle (°)    | Apex         | 7.0 ± 3.8    | -5.5 ± 6.0   | <0.0001 |
|                       | Midanterior  | -2.4 ± 3.3   | -6 ± 4.8     | 0.745   |

|                         |              |                 |                 |        |
|-------------------------|--------------|-----------------|-----------------|--------|
|                         | Anterobasal  | $-3.6 \pm 5.7$  | $-7.9 \pm 6.1$  | 0.515  |
|                         | Midlateral   | $3.6 \pm 3.9$   | $-4.7 \pm 6.2$  | 0.007  |
|                         | Basolateral  | $-4.2 \pm 2.4$  | $-7.7 \pm 5.3$  | 0.748  |
|                         | Midposterior | $3.5 \pm 4.1$   | $-2.2 \pm 6.4$  | 0.156  |
|                         | Posterobasal | $1.4 \pm 1.7$   | $-3.9 \pm 3.8$  | 0.229  |
|                         | Midseptal    | $-0.4 \pm 3.1$  | $-5.1 \pm 4.7$  | 0.380  |
|                         | Basoseptal   | $-2.4 \pm 4.2$  | $-6.0 \pm 6.4$  | 0.745  |
| Rotation velocity (m/s) | Apex         | $48.3 \pm 30.6$ | $40.0 \pm 15.3$ | 0.945  |
|                         | Midanterior  | $23.2 \pm 6.9$  | $37.2 \pm 12.5$ | 0.425  |
|                         | Anterobasal  | $40.8 \pm 25.0$ | $41.2 \pm 16.8$ | >1.000 |
|                         | Midlateral   | $23.1 \pm 12.1$ | $44.3 \pm 16.9$ | 0.041  |
|                         | Basolateral  | $35.6 \pm 16.1$ | $44.0 \pm 15.9$ | 0.932  |
|                         | Midposterior | $22.5 \pm 8.8$  | $42.7 \pm 22.4$ | 0.059  |
|                         | Posterobasal | $18.3 \pm 12.1$ | $29.4 \pm 12.4$ | 0.728  |
|                         | Midseptal    | $24.1 \pm 9.3$  | $40.3 \pm 13.5$ | 0.236  |
|                         | Basoseptal   | $31.3 \pm 9.8$  | $40.1 \pm 17.3$ | 0.906  |
| LAT (ms)                | Apex         | $26 \pm 15$     | $14 \pm 14$     | 0.770  |
|                         | Midanterior  | $14 \pm 12$     | $19 \pm 20$     | 0.999  |
|                         | Anterobasal  | $35 \pm 19$     | $40 \pm 27$     | 0.998  |
|                         | Midlateral   | $59 \pm 14$     | $46 \pm 13$     | 0.581  |
|                         | Basolateral  | $67 \pm 23$     | $60 \pm 17$     | 0.986  |
|                         | Midposterior | $49 \pm 24$     | $28 \pm 15$     | 0.083  |
|                         | Posterobasal | $65 \pm 25$     | $53 \pm 13$     | 0.652  |

|                   |              |             |             |         |
|-------------------|--------------|-------------|-------------|---------|
|                   | Midseptal    | 12 ± 19     | 10 ± 11     | >1.000  |
|                   | Basoseptal   | 47 ± 25     | 34 ± 17     | 0.591   |
| LEMD (ms)         | Apex         | 373 ± 72    | 383 ± 56    | >1.000  |
|                   | Midanterior  | 343 ± 74    | 387 ± 54    | 0.421   |
|                   | Anterobasal  | 381 ± 57    | 369 ± 44    | 1.000   |
|                   | Midlateral   | 366 ± 40    | 373 ± 41    | >1.000  |
|                   | Basolateral  | 377 ± 51    | 349 ± 37    | 0.909   |
|                   | Midposterior | 394 ± 41    | 363 ± 60    | 0.850   |
|                   | Posterobasal | 389 ± 38    | 329 ± 45    | 0.101   |
|                   | Midseptal    | 347 ± 46    | 393 ± 42    | 0.378   |
|                   | Basoseptal   | 353 ± 71    | 347 ± 65    | >1.000  |
| TEMD (ms)         | Apex         | 399 ± 70    | 397 ± 52    | >1.000  |
|                   | Midanterior  | 357 ± 74    | 407 ± 53    | 0.392   |
|                   | Anterobasal  | 416 ± 47    | 409 ± 49    | >1.000  |
|                   | Midlateral   | 425 ± 35    | 418 ± 43    | >1.000  |
|                   | Basolateral  | 444 ± 43    | 409 ± 37    | 0.817   |
|                   | Midposterior | 443 ± 22    | 375 ± 95    | 0.073   |
|                   | Posterobasal | 454 ± 14    | 382 ± 51    | 0.045   |
|                   | Midseptal    | 359 ± 55    | 402 ± 44    | 0.566   |
|                   | Basoseptal   | 400 ± 52    | 381 ± 70    | 0.996   |
| LGE intensity (%) | Apex         | 13.33±10.27 | 11.19±10.28 | >0.9999 |
|                   | Midanterior  | 3.9±2.91    | 3.93±4.08   | >0.9999 |
|                   | Anterobasal  | 3.91±4.05   | 2.5±3.01    | >0.9999 |

|  |              |             |             |         |
|--|--------------|-------------|-------------|---------|
|  | Midlateral   | 3.44±4.79   | 3.08±7.94   | >0.9999 |
|  | Basolateral  | 2.22±1.22   | 4±9.53      | >0.9999 |
|  | Midposterior | 9.86±7.58   | 5.97±7.6    | 0.9905  |
|  | Posterobasal | 11.28±9.12  | 6.22±8.45   | 0.9465  |
|  | Midseptal    | 17.22±11.69 | 14.87±16.34 | 0.9998  |
|  | Basoseptal   | 18.01±12.65 | 10.58±11.65 | 0.6549  |

LAT, Local activation time. LGE, Late gadolinium enhancement. LEMD, Local rotational

electro-mechanical delay. TEMD, Total rotational electro-mechanical delay. Values are mean ±

SD or median (25th;75th percentile)



**Supplementary Table S5** Segmental EM comparison within groups with wringing rotation

(Group A) and rigid-body-type rotation (Group B)

| Parameter             | Comparison            | P value<br>(Group A) | P value<br>(Group B) |
|-----------------------|-----------------------|----------------------|----------------------|
| Unipolar voltage (mV) | Apex vs. Midanterior  | 0.977                | 1.000                |
|                       | Apex vs. Anterobasal  | 0.672                | 0.820                |
|                       | Apex vs. Midlateral   | >1.000               | 0.165                |
|                       | Apex vs. Basolateral  | 0.997                | <b>0.002</b>         |
|                       | Apex vs. Midposterior | 0.999                | <b>&lt;0.0001</b>    |
|                       | Apex vs. Posterobasal | >1.000               | 0.134                |
|                       | Apex vs. Midseptal    | >1.000               | 0.985                |
|                       | Apex vs. Basoseptal   | 0.826                | 0.989                |
|                       | Bipolar voltage (mV)  | Apex vs. Midanterior | 0.998                |
| Apex vs. Anterobasal  |                       | >1.000               | 0.967                |
| Apex vs. Midlateral   |                       | >1.000               | 0.342                |
| Apex vs. Basolateral  |                       | >1.000               | <b>0.001</b>         |
| Apex vs. Midposterior |                       | 0.798                | <b>&lt;0.0001</b>    |
| Apex vs. Posterobasal |                       | >1.000               | <b>0.004</b>         |
| Apex vs. Midseptal    |                       | >1.000               | >1.000               |
| Apex vs. Basoseptal   |                       | 0.780                | 0.995                |
| Rotation angle (°)    |                       | Apex vs. Midanterior | <b>0.020</b>         |
|                       | Apex vs. Anterobasal  | <b>0.005</b>         | 0.616                |
|                       | Apex vs. Midlateral   | 0.917                | 1.000                |

|                         |                       |              |                   |
|-------------------------|-----------------------|--------------|-------------------|
|                         | Apex vs. Basolateral  | <b>0.003</b> | 0.710             |
|                         | Apex vs. Midposterior | 0.910        | 0.252             |
|                         | Apex vs. Posterobasal | 0.445        | 0.952             |
|                         | Apex vs. Midseptal    | 0.131        | >1.000            |
|                         | Apex vs. Basoseptal   | <b>0.019</b> | >1.000            |
| Rotation velocity (m/s) | Apex vs. Midanterior  | 0.061        | 0.997             |
|                         | Apex vs. Anterobasal  | 0.988        | >1.000            |
|                         | Apex vs. Midlateral   | 0.060        | 0.980             |
|                         | Apex vs. Basolateral  | 0.790        | 0.986             |
|                         | Apex vs. Midposterior | <b>0.049</b> | 0.999             |
|                         | Apex vs. Posterobasal | <b>0.012</b> | 0.165             |
|                         | Apex vs. Midseptal    | 0.080        | >1.000            |
|                         | Apex vs. Basoseptal   | 0.440        | >1.000            |
| LAT (ms)                | Apex vs. Midanterior  | 0.902        | 0.957             |
|                         | Apex vs. Anterobasal  | 0.979        | <b>&lt;0.0001</b> |
|                         | Apex vs. Midlateral   | <b>0.009</b> | <b>&lt;0.0001</b> |
|                         | Apex vs. Basolateral  | <b>0.001</b> | <b>&lt;0.0001</b> |
|                         | Apex vs. Midposterior | 0.166        | 0.051             |
|                         | Apex vs. Posterobasal | <b>0.001</b> | <b>&lt;0.0001</b> |
|                         | Apex vs. Midseptal    | 0.788        | 0.981             |
|                         | Apex vs. Basoseptal   | 0.250        | <b>0.001</b>      |
| LEMD (ms)               | Apex vs. Midanterior  | 0.951        | >1.000            |
|                         | Apex vs. Anterobasal  | >1.000       | 0.964             |

|                   |                            |         |               |
|-------------------|----------------------------|---------|---------------|
|                   | Apex vs. Midlateral        | >1.000  | 0.995         |
|                   | Apex vs. Basolateral       | >1.000  | 0.177         |
|                   | Apex vs. Midposterior      | 0.995   | 0.777         |
|                   | Apex vs. Posterobasal      | 0.999   | <b>0.003</b>  |
|                   | Apex vs. Midseptal         | 0.978   | 0.998         |
|                   | Apex vs. Basoseptal        | 0.996   | 0.121         |
| TEMD (ms)         | Apex vs. Midanterior       | 0.832   | 0.999         |
|                   | Apex vs. Anterobasal       | 0.999   | 0.994         |
|                   | Apex vs. Midlateral        | 0.986   | 0.825         |
|                   | Apex vs. Basolateral       | 0.749   | 0.993         |
|                   | Apex vs. Midposterior      | 0.784   | 0.756         |
|                   | Apex vs. Posterobasal      | 0.514   | 0.965         |
|                   | Apex vs. Midseptal         | 0.861   | >1.000        |
|                   | Apex vs. Basoseptal        | >1.000  | 0.949         |
| LGE intensity (%) | Midseptal vs. Apex         | 0.9966  | 0.8515        |
|                   | Midseptal vs. Midanterior  | 0.1802  | <b>0.0020</b> |
|                   | Midseptal vs. Anterobasal  | 0.1809  | <b>0.0003</b> |
|                   | Midseptal vs. Midlateral   | 0.1496  | <b>0.0007</b> |
|                   | Midseptal vs. Basolateral  | 0.0881  | <b>0.0022</b> |
|                   | Midseptal vs. Midposterior | 0.8515  | <b>0.0220</b> |
|                   | Midseptal vs. Posterobasal | 0.9507  | <b>0.0287</b> |
|                   | Midseptal vs. Basoseptal   | >0.9999 | 0.7172        |

LAT, Local activation time. LEMD, Local rotational electro-mechanical delay. TEMD, Total rotational electro-mechanical delay. Values are mean  $\pm$  SD or median (25th;75th percentile)

**Supplementary Table S6:** P values of the of the Pearson's' coefficients for wringing rotation (Group A) and rigid-body-type rotation (Group B)

| Wringing rotation (Group A) |                             |                            |                          |                   |               |              |               |              |
|-----------------------------|-----------------------------|----------------------------|--------------------------|-------------------|---------------|--------------|---------------|--------------|
|                             | Unipolar<br>Voltage<br>(mV) | Bipolar<br>Voltage<br>(mV) | Rotation<br>ED-ES<br>(°) | Velocity<br>(m/s) | LAT<br>(ms)   | LEMD<br>(ms) | TEMD<br>(ms)  | LGE          |
| Unipolar<br>Voltage<br>(mV) |                             | 0.219                      | 0.583                    | 0.726             | 0.754         | 0.444        | 0.839         | <b>0.009</b> |
| Bipolar<br>Voltage<br>(mV)  | 0.219                       |                            | 0.226                    | 0.748             | 0.715         | 0.016        | 0.193         | 0.699        |
| Rotation<br>ED-ES (°)       | 0.583                       | 0.226                      |                          | 0.905             | 0.985         | 0.457        | 0.714         | 0.490        |
| Velocity<br>(m/s)           | 0.726                       | 0.748                      | 0.905                    |                   | 0.637         | 0.804        | 0.882         | 0.956        |
| LAT (ms)                    | 0.754                       | 0.715                      | 0.985                    | 0.637             |               | 0.065        | <b>0.0005</b> | 0.457        |
| LEMD (ms)                   | 0.444                       | 0.016                      | 0.457                    | 0.804             | 0.065         |              | <b>0.001</b>  | 0.535        |
| TEMD (ms)                   | 0.839                       | 0.193                      | 0.714                    | 0.882             | <b>0.0005</b> | <b>0.001</b> |               | 0.447        |
| LGE                         | <b>0.009</b>                | 0.699                      | 0.490                    | 0.956             | 0.457         | 0.535        | 0.447         |              |

| Rigid-body-type rotation (Group B) |                             |                            |                          |                   |              |              |              |       |
|------------------------------------|-----------------------------|----------------------------|--------------------------|-------------------|--------------|--------------|--------------|-------|
|                                    | Unipolar<br>Voltage<br>(mV) | Bipolar<br>Voltage<br>(mV) | Rotation<br>ED-ES<br>(°) | Velocity<br>(m/s) | LAT<br>(ms)  | LEMD<br>(ms) | TEMD<br>(ms) | LGE   |
| Unipolar<br>Voltage<br>(mV)        |                             | 0.0002                     | 0.521                    | 0.489             | 0.074        | 0.199        | 0.851        | 0.127 |
| Bipolar<br>Voltage<br>(mV)         | 0.0002                      |                            | 0.299                    | 0.894             | 0.079        | 0.145        | 0.945        | 0.213 |
| Rotation<br>ED-ES (°)              | 0.521                       | 0.299                      |                          | 0.559             | 0.555        | 0.879        | 0.277        | 0.565 |
| Velocity<br>(m/s)                  | 0.489                       | 0.894                      | 0.559                    |                   | 0.922        | 0.297        | 0.097        | 0.755 |
| LAT (ms)                           | 0.074                       | 0.079                      | 0.555                    | 0.922             |              | <b>0.011</b> | 0.864        | 0.073 |
| LEMD (ms)                          | 0.199                       | 0.145                      | 0.879                    | 0.297             | <b>0.011</b> |              | 0.119        | 0.586 |
| TEMD (ms)                          | 0.851                       | 0.945                      | 0.277                    | 0.097             | 0.865        | 0.119        |              | 0.169 |
| LGE                                | 0.127                       | 0.213                      | 0.565                    | 0.755             | 0.073        | 0.586        | 0.169        |       |

**Reference:**

- 1 Russel, I. K., Tecelao, S. R., Kuijer, J. P., Heethaar, R. M. & Marcus, J. T. Comparison of 2D and 3D calculation of left ventricular torsion as circumferential-longitudinal shear angle using cardiovascular magnetic resonance tagging. *J Cardiovasc Magn Reson* **11**, 8 (2009).
